# Supplementary material
Source: PubMed Central journal article supplement (PMC6789565)
Supplement: pnas.1910295116.sapp.pdf [file pnas.1910295116.sapp.pdf]

Supplementary Information for

## **An Experimental Test of the Ovulatory Homologue Model of Female Orgasm**

Mihaela Pavlicev<sup>1,2</sup>, Andreja Moset Zupan<sup>1</sup>, Amanda Barry<sup>1</sup>, Savannah Walters<sup>5</sup>, Kristin M. Milano<sup>6</sup>, Harvey J. Kliman<sup>6</sup>, and Günter P. Wagner<sup>3,4,6</sup>

- 1) Department of Pediatrics, School of Medicine, University of Cincinnati, Cincinnati, OH
- 2) Department of Philosophy, University of Cincinnati, Cincinnati, OH
- 3) Department of Ecology and Evolutionary Biology, Yale University, New Haven, CT
- 4) Yale Systems Biology Institute, West Haven, CT
- 5) Department of Veterinary Services Surgical Core, Cincinnati Children's Hospital Medical Center, Cincinnati, OH
- 6) Department of Obstetrics, Gynecology and Reproductive Sciences, Yale Medical School, New Haven, CT

Corresponding author:  
Günter P. Wagner  
Email: [gunter.wagner@yale.edu](mailto:gunter.wagner@yale.edu)

**This PDF file includes:**

Figure S1

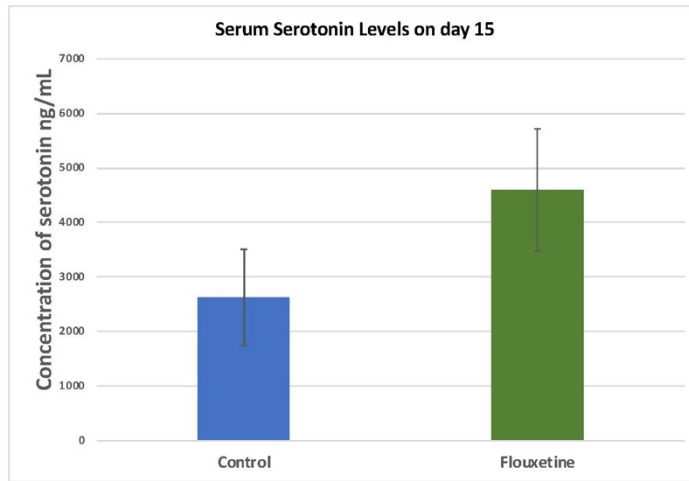

Supplemental Figure 1

**Fig. S1.** Serotonin measured in serum on day 15 of the experiment through ELISA. Note the nominal increase of serotonin after 14 days of fluoxetine treatment; control Mean = 2,626 ng 5HT/ml +/- 882.8 s.e.m., treatment Mean = 4,598 ng 5HT/ml +/- 1,119.7 s.e.m.; t-test  $p=0.095$ , MWU test  $p=0.075$ .
